# Supplementary material
Source: PubMed Central journal article supplement (PMC4351130)
Supplement: NIHMS653552-supplement-2.pdf [file NIHMS653552-supplement-2.pdf]

**Supplementary Table 1** Data collection and refinement statistics (molecular replacement)

|                                                        | Synchrotron                             | XFEL                                    |
|--------------------------------------------------------|-----------------------------------------|-----------------------------------------|
| <b>Data collection</b>                                 |                                         |                                         |
| Space group                                            | C 1 2 1                                 | C 1 2 1                                 |
| Cell dimensions                                        |                                         |                                         |
| <i>a</i> , <i>b</i> , <i>c</i> (Å)                     | 160.55, 86.12, 94.68                    | 156.2, 89.3, 96.4                       |
| $\alpha$ , $\beta$ , $\gamma$ (°)                      | 90.0, 92.2, 90.0                        | 90.0, 92.3, 90.0                        |
| Resolution (Å)                                         | 40.0-3.30 (3.51-3.30)*                  | 33.5-2.70 (2.80-2.70) *                 |
| <i>R</i> <sub>merge</sub> or <i>R</i> <sub>split</sub> | 0.173 (0.875) <i>R</i> <sub>merge</sub> | 0.118 (0.879) <i>R</i> <sub>split</sub> |
| <i>I</i> / $\sigma$ <i>I</i>                           | 11.7 (1.9)                              | 6.0 (1.3)                               |
| Completeness (%)                                       | 96.3 (97.3)                             | 100 (100)                               |
| Redundancy                                             | 4.3 (4.4)                               | 560 (209)                               |
| <b>Refinement</b>                                      |                                         |                                         |
| Resolution (Å)                                         | 37.97-3.28                              | 33.45-2.70                              |
| No. reflections                                        | 17,904                                  | 34,653                                  |
| <i>R</i> <sub>work</sub> / <i>R</i> <sub>free</sub>    | 0.239 / 0.273                           | 0.212 / 0.230                           |
| No. atoms                                              | A            B                          | A            B                          |
| Protein                                                | 2,921      2,901                        | 3,039      3,044                        |
| DIPP-NH <sub>2</sub>                                   | 49        49                            | 49        49                            |
| Na <sup>+</sup>                                        | 0         0                             | 1         1                             |
| Lipids and other                                       | 14        0                             | 80        79                            |
| <i>B</i> -factors                                      |                                         |                                         |
| Protein                                                | 93.1      96.1                          | 66.3      66.5                          |
| DIPP-NH <sub>2</sub>                                   | 93.8      101.5                         | 62.7      56.8                          |
| Na <sup>+</sup>                                        | N/A      N/A                            | 66.2      66.1                          |
| Lipids and other                                       | 92.5      N/A                           | 74.3      77.8                          |
| r.m.s. deviations                                      |                                         |                                         |
| Bond lengths (Å)                                       | 0.007                                   | 0.005                                   |
| Bond angles (°)                                        | 1.1                                     | 0.9                                     |

Number of crystals used for Synchrotron structure – 21, for XFEL structure – 36,083.

\*Values in parentheses are for highest-resolution shell.
